# Supplementary material for: The significant association of Taq1A genotypes in DRD2/ANKK1 with smoking cessation in a large-scale meta-analysis of Caucasian populations
Source: PubMed Central journal article supplement (PMC5068580; doi:10.1038/tp.2015.176), 2015-12-01
Supplement: tp2015176x1.pdf [file tp2015176x1.pdf]

Supplementary Table S1: Detailed sample size for each *Taq1A* genotype and other related characteristics reported in original studies.

| Study Name                  | Sample Origin | Language of Study | Current Smoker |                | Former Smoker |                | Hardy-Weinberg Equilibrium (HWE) |
|-----------------------------|---------------|-------------------|----------------|----------------|---------------|----------------|----------------------------------|
|                             |               |                   | A1/* genotype  | A2/A2 genotype | A1/* genotype | A2/A2 genotype |                                  |
| Noble et al. (1994)         | USA           | English           | 26             | 31             | 46            | 69             | 0.428                            |
| Bierut et al. (2000)        | USA           | English           | 153            | 235            | 196           | 370            | —                                |
| Wu et al. (2000) (Mexicans) | USA           | English           | 26             | 9              | 18            | 6              | 0.119                            |
| Wu et al. (2000) (Africans) | USA           | English           | 23             | 14             | 22            | 13             | 0.382                            |
| Yoshida et al.( 2001)       | Japan         | English           | 38             | 39             | 22            | 35             | 0.757                            |
| Hamajima et al.(2002)       | Japan         | English           | 125            | 101            | 90            | 43             | 0.947                            |
| Lerman et al. (2003)        | USA           | English           | 161            | 216            | 19            | 29             | >0.05                            |
| Cinciripini et al. (2004)   | USA           | English           | NA             | NA             | NA            | NA             | 0.279                            |
| Yudkin et al. (2004)        | UK            | English           | 273            | 397            | 37            | 45             | 0.43                             |
| Berlin et al. (2005)        | USA           | English           | NA             | NA             | NA            | NA             | 0.904                            |
| Morton et al. (2006)        | USA           | English           | 416            | 623            | 373           | 711            | 0.413                            |
| Swan et al. (2007)          | USA           | English           | 83             | 133            | 31            | 76             | 0.37                             |
| Ton et al. (2007)           | USA           | English           | 177            | 316            | 31            | 62             | >0.05                            |
| David et al. (2007)         | USA           | English           | 106            | 136            | 23            | 26             | >0.46                            |
| Han et al. (2008)           | South         | English           | 102            | 33             | 57            | 33             | 0.01                             |

|                         |         |         |     |     |     |     |       |
|-------------------------|---------|---------|-----|-----|-----|-----|-------|
|                         | Korea   |         |     |     |     |     |       |
| Wernicke et al. (2009)  | Germany | English | 31  | 50  | 14  | 34  | >0.05 |
| Munafò et al. (2009)    | UK      | English | 262 | 462 | 28  | 52  | 0.6   |
| Styn et al. (2009)      | USA     | English | 228 | 434 | 58  | 161 | <0.01 |
| Breitling et al. (2010) | Germany | English | 162 | 346 | 22  | 32  | 0.016 |
| Stapleton et al. (2011) | UK      | English | 82  | 113 | 91  | 133 | 0.15  |
| Wilcox et al. (2011)    | USA     | English | 27  | 34  | 4   | 11  | —     |
| Tashkin et al. (2012)   | USA     | English | 129 | 201 | 105 | 186 | —     |
| Gordiev et al. (2013)   | Russia  | English | 62  | 140 | 65  | 92  | 0.16  |
| Ohmoto et al. (2014)    | Japan   | English | 48  | 27  | 15  | 6   | 0.89  |

Supplementary Table S2: Detailed information of sensitivity analysis for the meta-analyses across all the combined studies.

| Removed Study Name          | Odds Ratio (OR) | Lower Limit | Upper Limit | Z-Value | P-Value |
|-----------------------------|-----------------|-------------|-------------|---------|---------|
| Noble et al. (1994)         | 1.16            | 1.06        | 1.26        | 3.28    | 0.0010  |
| Bierut et al. (2000)        | 1.15            | 1.05        | 1.26        | 3.02    | 0.0026  |
| Wu et al. (2000) (Mexicans) | 1.16            | 1.06        | 1.27        | 3.36    | 0.0008  |
| Wu et al. (2000) (Africans) | 1.16            | 1.06        | 1.27        | 3.36    | 0.0008  |
| Yoshida et al. (2001)       | 1.15            | 1.06        | 1.26        | 3.21    | 0.0013  |
| Hamajima et al. (2002)      | 1.19            | 1.09        | 1.30        | 3.86    | 0.0001  |
| Lerman et al. (2003)        | 1.16            | 1.06        | 1.27        | 3.32    | 0.0009  |
| Cinciripini et al. (2004)   | 1.15            | 1.05        | 1.25        | 3.00    | 0.0027  |
| Yudkin et al. (2004)        | 1.17            | 1.07        | 1.28        | 3.55    | 0.0004  |
| Berlin et al. (2005)        | 1.15            | 1.05        | 1.26        | 3.03    | 0.0024  |
| Morton et al. (2006)        | 1.13            | 1.02        | 1.24        | 2.32    | 0.0201  |
| Swan et al. (2007)          | 1.15            | 1.05        | 1.26        | 3.10    | 0.0019  |
| Ton et al. (2007)           | 1.16            | 1.06        | 1.27        | 3.31    | 0.0009  |
| David et al. (2007)         | 1.17            | 1.07        | 1.27        | 3.44    | 0.0006  |
| Han et al. (2008)           | 1.15            | 1.05        | 1.25        | 3.08    | 0.0020  |
| Wernicke et al. (2009)      | 1.16            | 1.06        | 1.26        | 3.25    | 0.0012  |
| Munafo et al. (2009)        | 1.16            | 1.07        | 1.27        | 3.36    | 0.0008  |
| Styn et al. (2009)          | 1.14            | 1.04        | 1.25        | 2.88    | 0.0039  |
| Breitling et al. (2010)     | 1.17            | 1.08        | 1.28        | 3.58    | 0.0003  |
| Stapleton et al. (2011)     | 1.17            | 1.07        | 1.27        | 3.36    | 0.0008  |
| Wilcox et al. (2011)        | 1.16            | 1.06        | 1.26        | 3.27    | 0.0011  |
| Tashkin et al. (2012)       | 1.16            | 1.06        | 1.27        | 3.26    | 0.0011  |
| Gordiev et al. (2013)       | 1.19            | 1.09        | 1.30        | 3.84    | 0.0001  |
| Ohmoto et al. (2014)        | 1.16            | 1.07        | 1.27        | 3.41    | 0.0007  |

Supplementary Table S3: Detailed information of accumulative analysis across all the combined studies

| Published Year | Odds Ratio (OR) | Lower Limit | Upper Limit | Z-Value | P-Value |
|----------------|-----------------|-------------|-------------|---------|---------|
| 1994           | 1.26            | 0.66        | 2.39        | 0.70    | 0.4827  |
| 2000           | 1.20            | 0.95        | 1.52        | 1.55    | 0.1200  |
| 2001           | 1.24            | 0.99        | 1.54        | 1.87    | 0.0618  |
| 2002           | 1.07            | 0.88        | 1.30        | 0.65    | 0.5136  |
| 2003           | 1.07            | 0.89        | 1.30        | 0.75    | 0.4541  |
| 2004           | 1.10            | 0.93        | 1.29        | 1.13    | 0.2566  |
| 2005           | 1.14            | 0.98        | 1.32        | 1.72    | 0.0860  |
| 2006           | 1.19            | 1.06        | 1.34        | 3.04    | 0.0024  |
| 2007           | 1.19            | 1.07        | 1.32        | 3.23    | 0.0012  |
| 2008           | 1.21            | 1.09        | 1.34        | 3.53    | 0.0004  |
| 2009           | 1.22            | 1.11        | 1.35        | 4.08    | 0.0000  |
| 2010           | 1.20            | 1.09        | 1.32        | 3.80    | 0.0001  |
| 2011           | 1.20            | 1.09        | 1.32        | 3.84    | 0.0001  |
| 2012           | 1.19            | 1.09        | 1.31        | 3.91    | 0.0001  |
| 2013           | 1.16            | 1.07        | 1.27        | 3.41    | 0.0007  |
| 2014           | 1.16            | 1.06        | 1.27        | 3.34    | 0.0008  |
