# Supplementary material for: The significant association of Taq1A genotypes in DRD2/ANKK1 with smoking cessation in a large-scale meta-analysis of Caucasian populations
Source: PubMed Central journal article supplement (PMC5068580; doi:10.1038/tp.2015.176), 2015-12-01
Supplement: tp2015176x2.pdf [file tp2015176x2.pdf]

### Supplementary Figure S1

Flow diagram of studies selection in meta-analysis

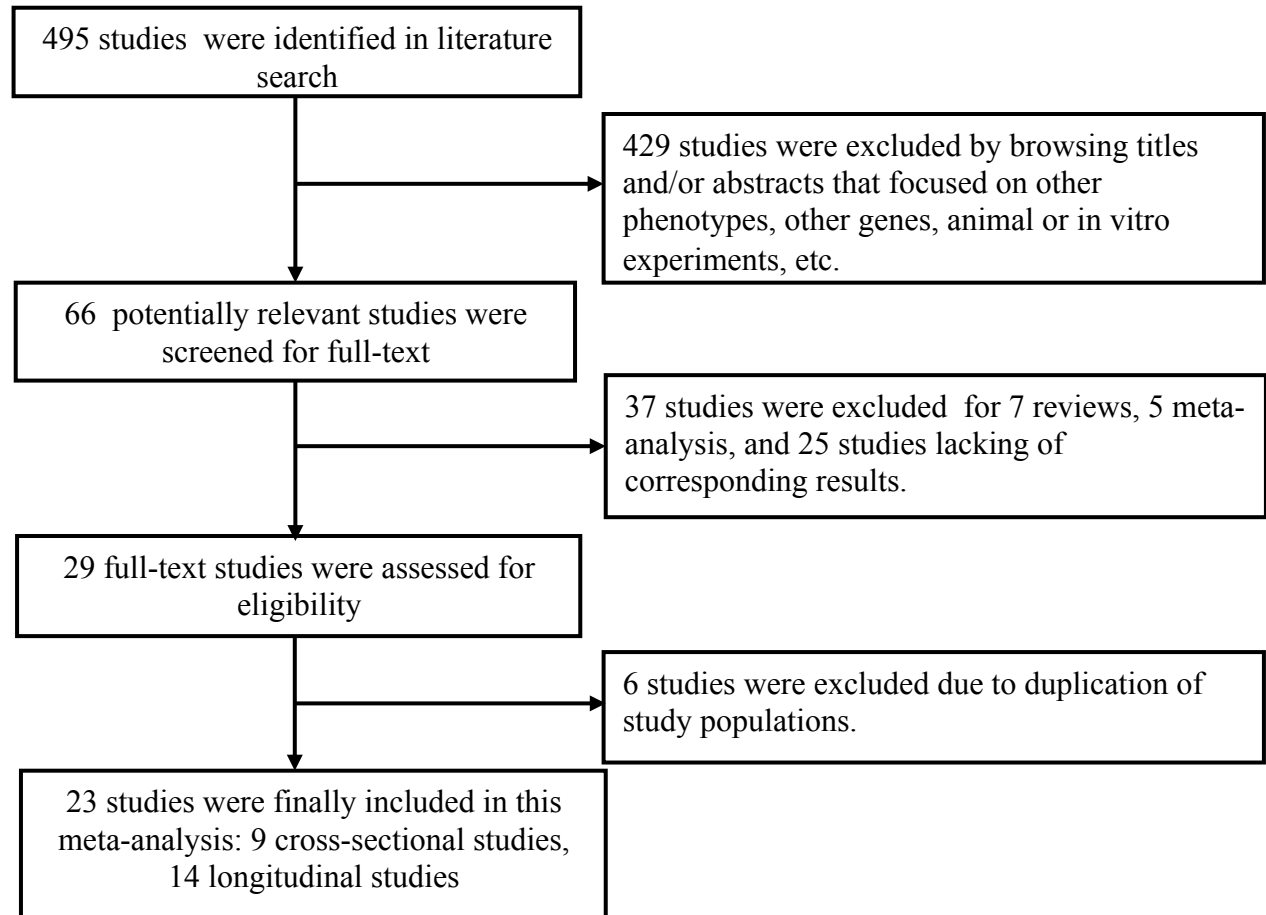

Figure S1

## Supplementary Figure S2

Forest plot of the meta-analysis results for the association between *Taq1A* A1/\* genotypes and smoking cessation across cross-sectional studies based on predominantly Caucasians without the Gordiev study. The Z-value and P-value of each eligible study are displayed by rows. The central vertical solid line stands for ORs that equal to 1 for the null hypothesis. The OR and 95% CI of each study are represented by the square and horizontal bar, respectively. The pooled OR, which is represented by the diamond symbol, underneath the forest plot was calculated under the fixed-effects model.

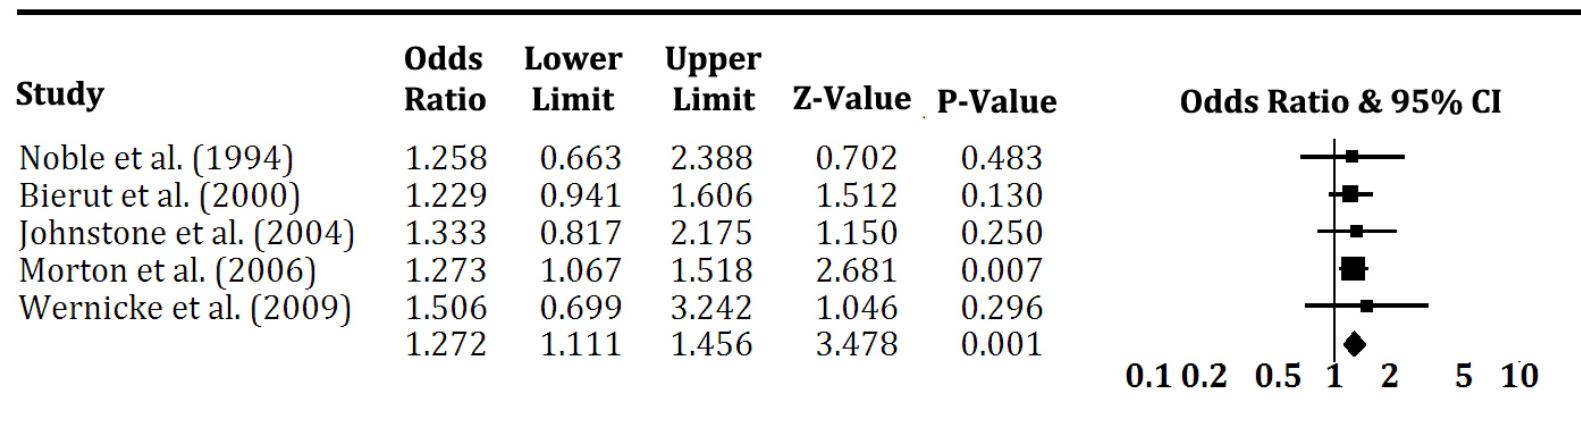

Figure S2

### Supplementary Figure S3

Forest plot of the meta-analysis results for the association between *Taq1A* A1/\* genotypes and smoking cessation across longitudinal studies based on predominant Caucasians. The Z-value and P-value of each eligible study are displayed by rows. The central vertical solid line stands for ORs that equal to 1 for the null hypothesis. The OR and 95% CI of each study are represented by the square and horizontal bar, respectively. The pooled OR, which is represented by the diamond symbol, underneath the forest plot was calculated under the fixed-effects model.

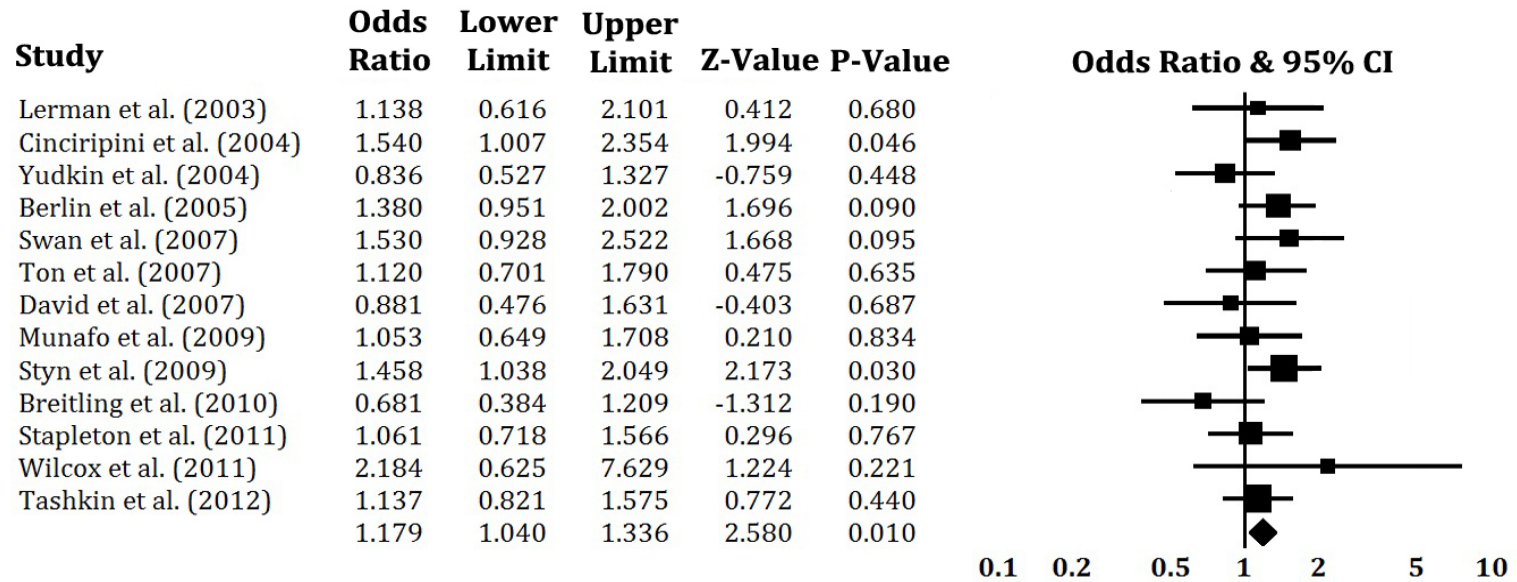

Figure S3

### Supplementary Figure S4

Forest plot of the meta-analysis results for the association between *Taq1A* A1/\* genotypes and smoking cessation across combined studies based on predominant Caucasians. The Z-value and P-value of each eligible study are displayed by rows. The central vertical solid line stands for ORs that equal to 1 for the null hypothesis. The OR and 95% CI of each study are represented by the square and horizontal bar, respectively. The pooled OR, which is represented by the diamond symbol, underneath the forest plot was calculated under the fixed-effects model.

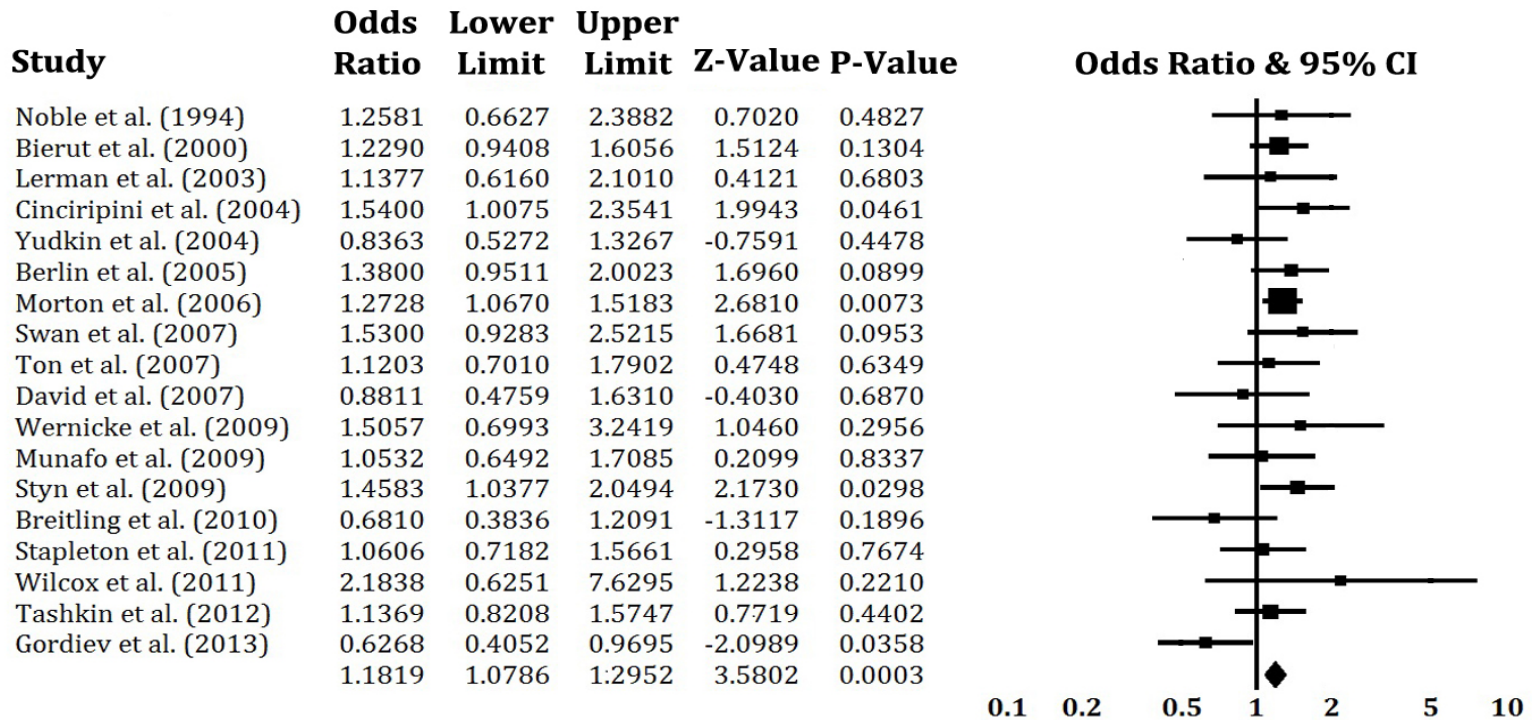

Figure S4

### Supplementary Figure S5

Funnel plots of publication biases of cross-sectional studies; (S5a) all the cross-sectional studies, (S5b) cross-sectional studies based on predominant Caucasians, and (S5c) cross-sectional studies based on predominant Caucasians without the Gordiev study. Here, Y-axis stands for the standard error of the log odds ratio and X-axis stands for the log odds ratio. Each dot stands for an individual study.

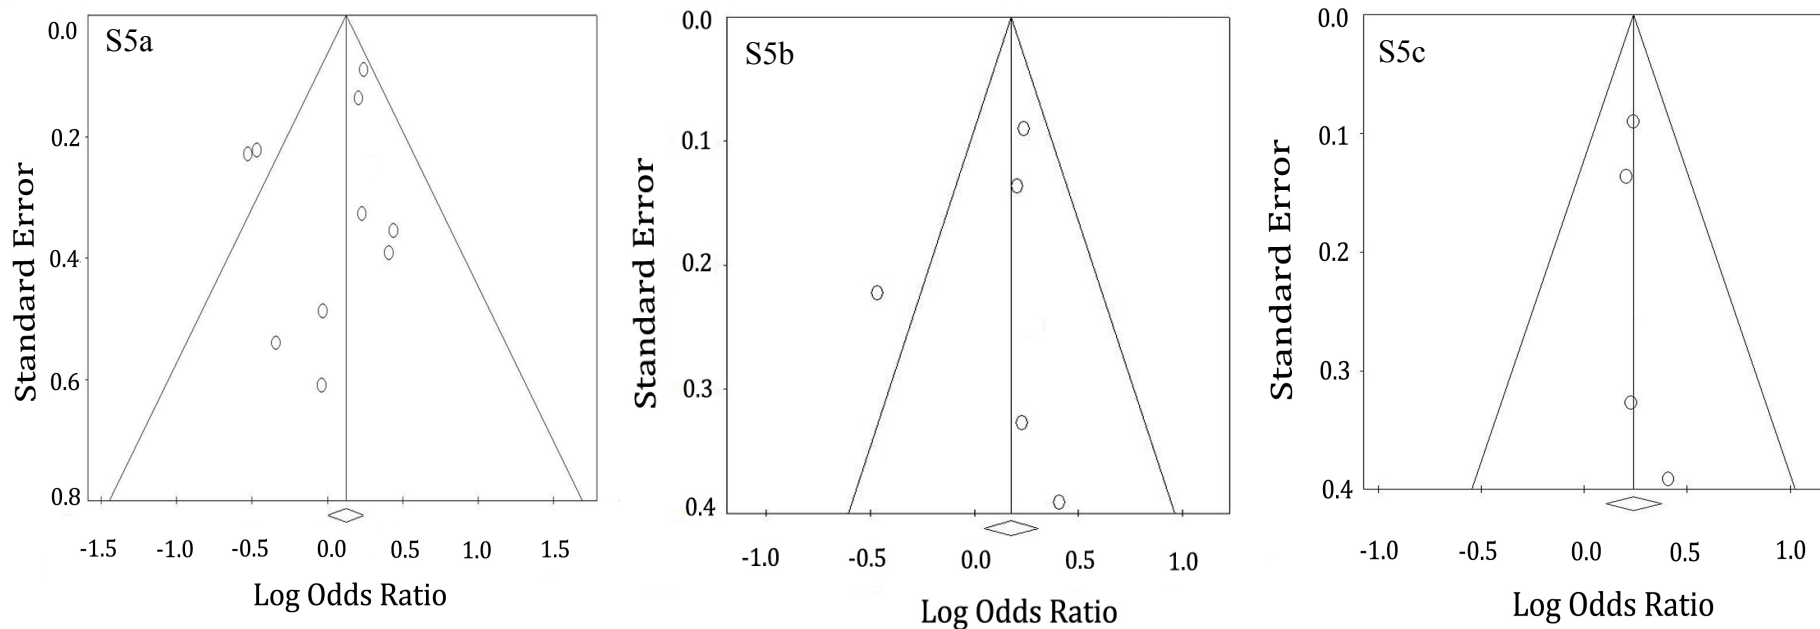

Figure S5

### Supplementary Figure S6

Funnel plots of publication biases of longitudinal studies; (S6a) all the longitudinal studies, (S6b) longitudinal studies based on predominant Caucasians. Here, Y-axis stands for the standard error of the log odds ratio and X-axis stands for the log odds ratio. Each dot stands for an individual study.

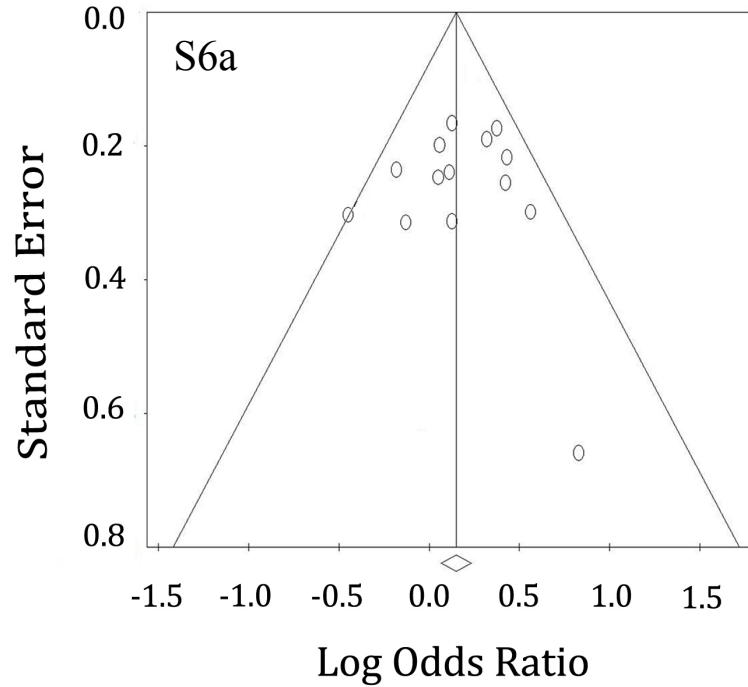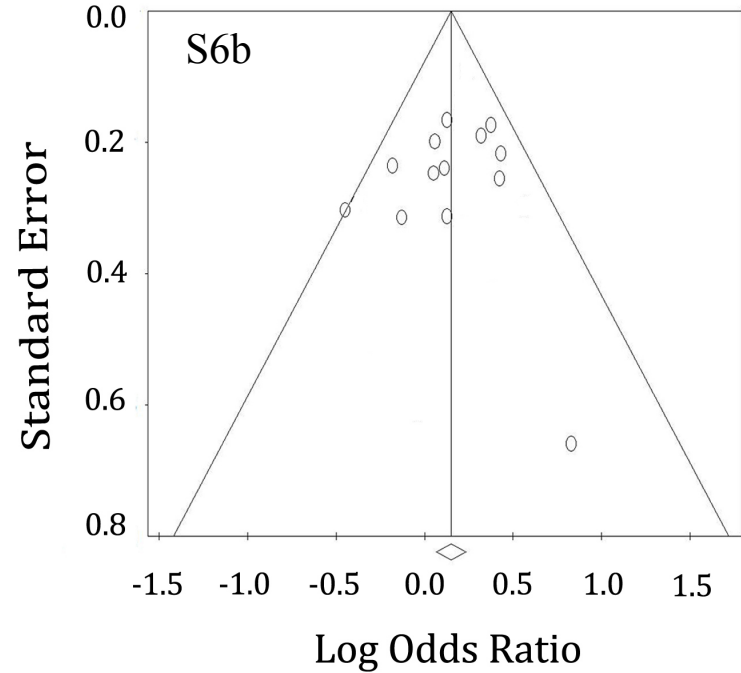

Figure S6

### Supplementary Figure S7

Funnel plots of publication biases of combined studies; (S7a) all the combined studies, (S7b) combined studies based on predominant Caucasians, and (S7c) combined studies based on predominant Caucasians without the study of Gordiev et al. Here, Y-axis stands for the standard error of the log odds ratio and X-axis stands for the log odds ratio. Each dot stands for an individual study.

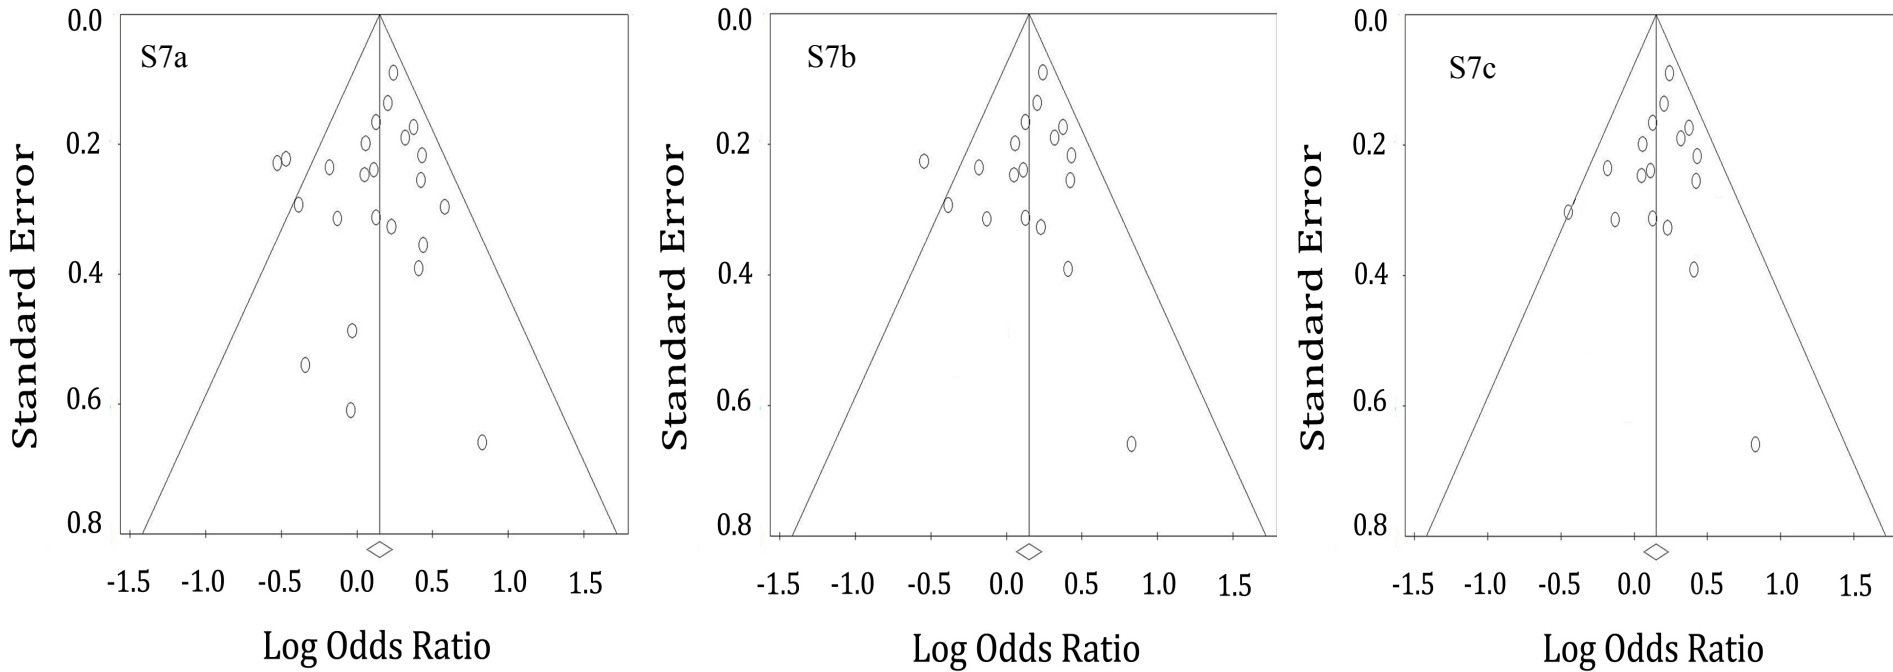

Figure S7
